# Supplementary material for: A SpoIID Homolog Cleaves Glycan Strands at the Chlamydial Division Septum
Source: PubMed Central journal article supplement (PMC6635528; doi:10.1128/mbio.01128-19), 2019-07-16
Supplement: mBio.01128-19-sf005.pdf [file mBio.01128-19-sf005.pdf]

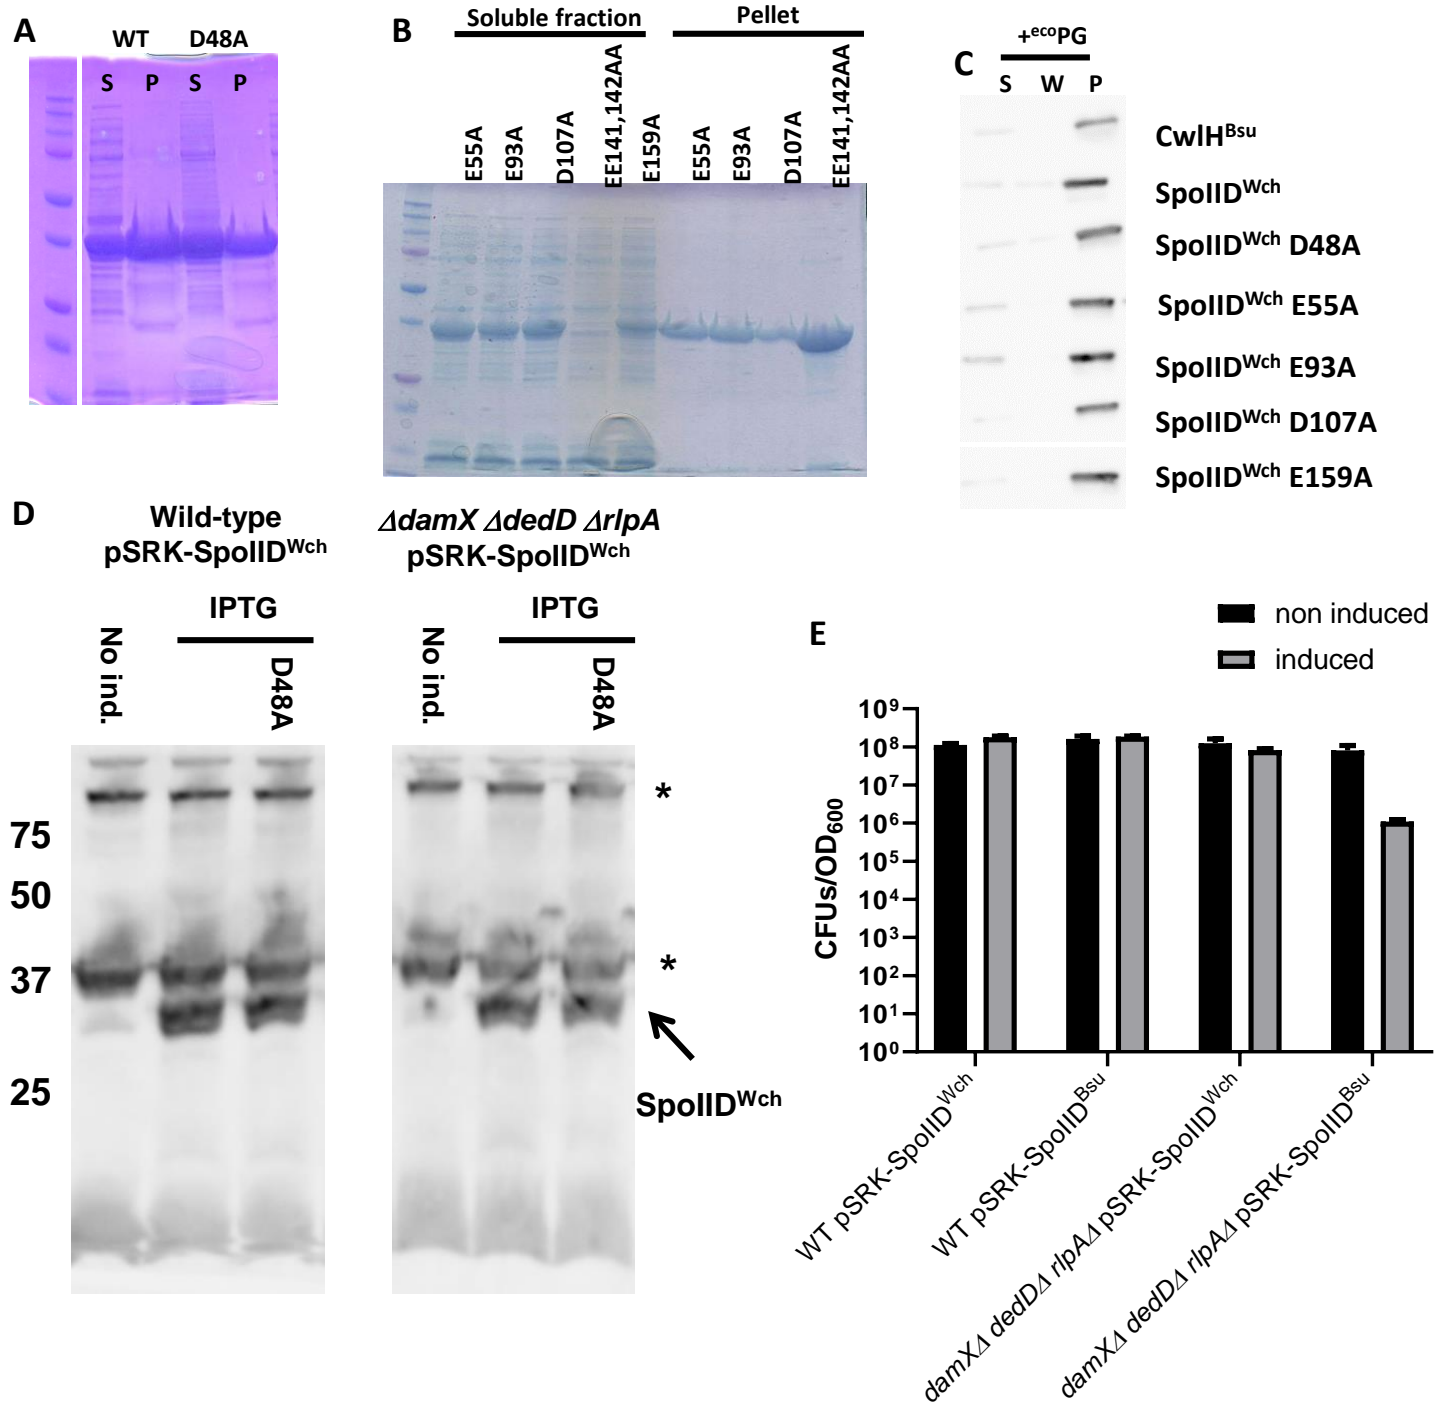

**Figure S5**
